# Supplementary material for: Smectic A–hexagonal columnar–B7 phase transition of acute-angle bent-core molecules
Source: Royal Society of Chemistry journal article supplement (doi:10.1039/c4tc02723j), 2015-01-01
Supplement: c4tc02723j1.pdf [file c4tc02723j1.pdf]

# Supporting Information

**Smectic A–Hexagonal columnar–B7 phase Transition of Acute-angle**

**Bent-core Molecules†**

Eun-Woo Lee, Masaya Hattori, Fumiya Uehara, Masatoshi Tokita, Susumu Kawauchi,  
Junji Watanabe and Sungmin Kang\*

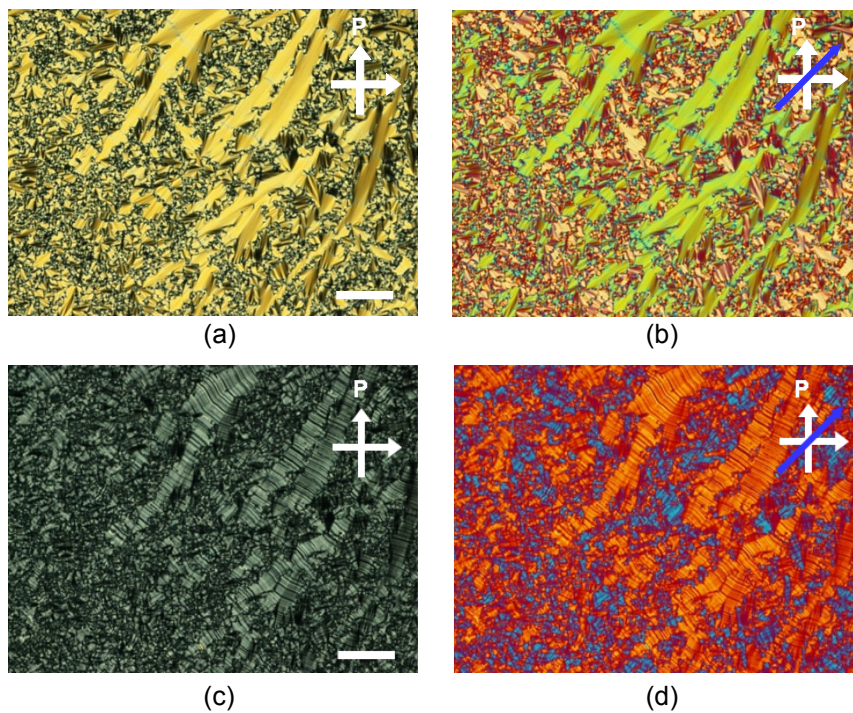

**Fig. S1** POM micrographs of SmA (a and b) and B7 (c and d) phases for N(1,7)–EIE–S16. (a) and (c) without compensator, (b) retardation is enhanced along the layer normal (green-colored domain) with compensator (530 nm). (d) retardation is reduced in the same domain (orange colored) with compensator. Here, the axis of compensator (bar) was set to almost parallel to the layer normal direction which is  $45^\circ$  direction. The scale bar indicates  $100\ \mu\text{m}$ .

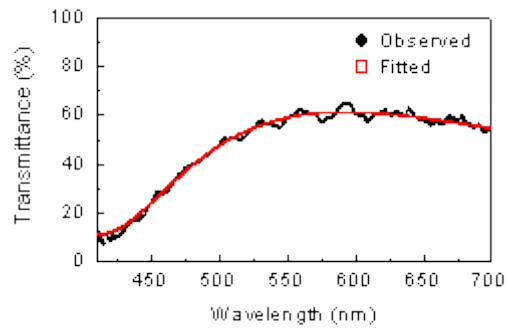

(a)

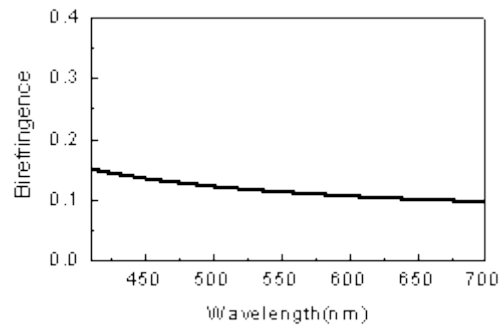

(b)

**Fig. S2** (a) Transmittance spectrum observed for fan-shape domain in SmA phase for N(1,7)-EIE-S16 (black solid circle) and the fitted value (red open square) by determination of Cauchy's coefficients. (b) Wavelength dispersion of obtained birefringence ( $\Delta n'$ ).

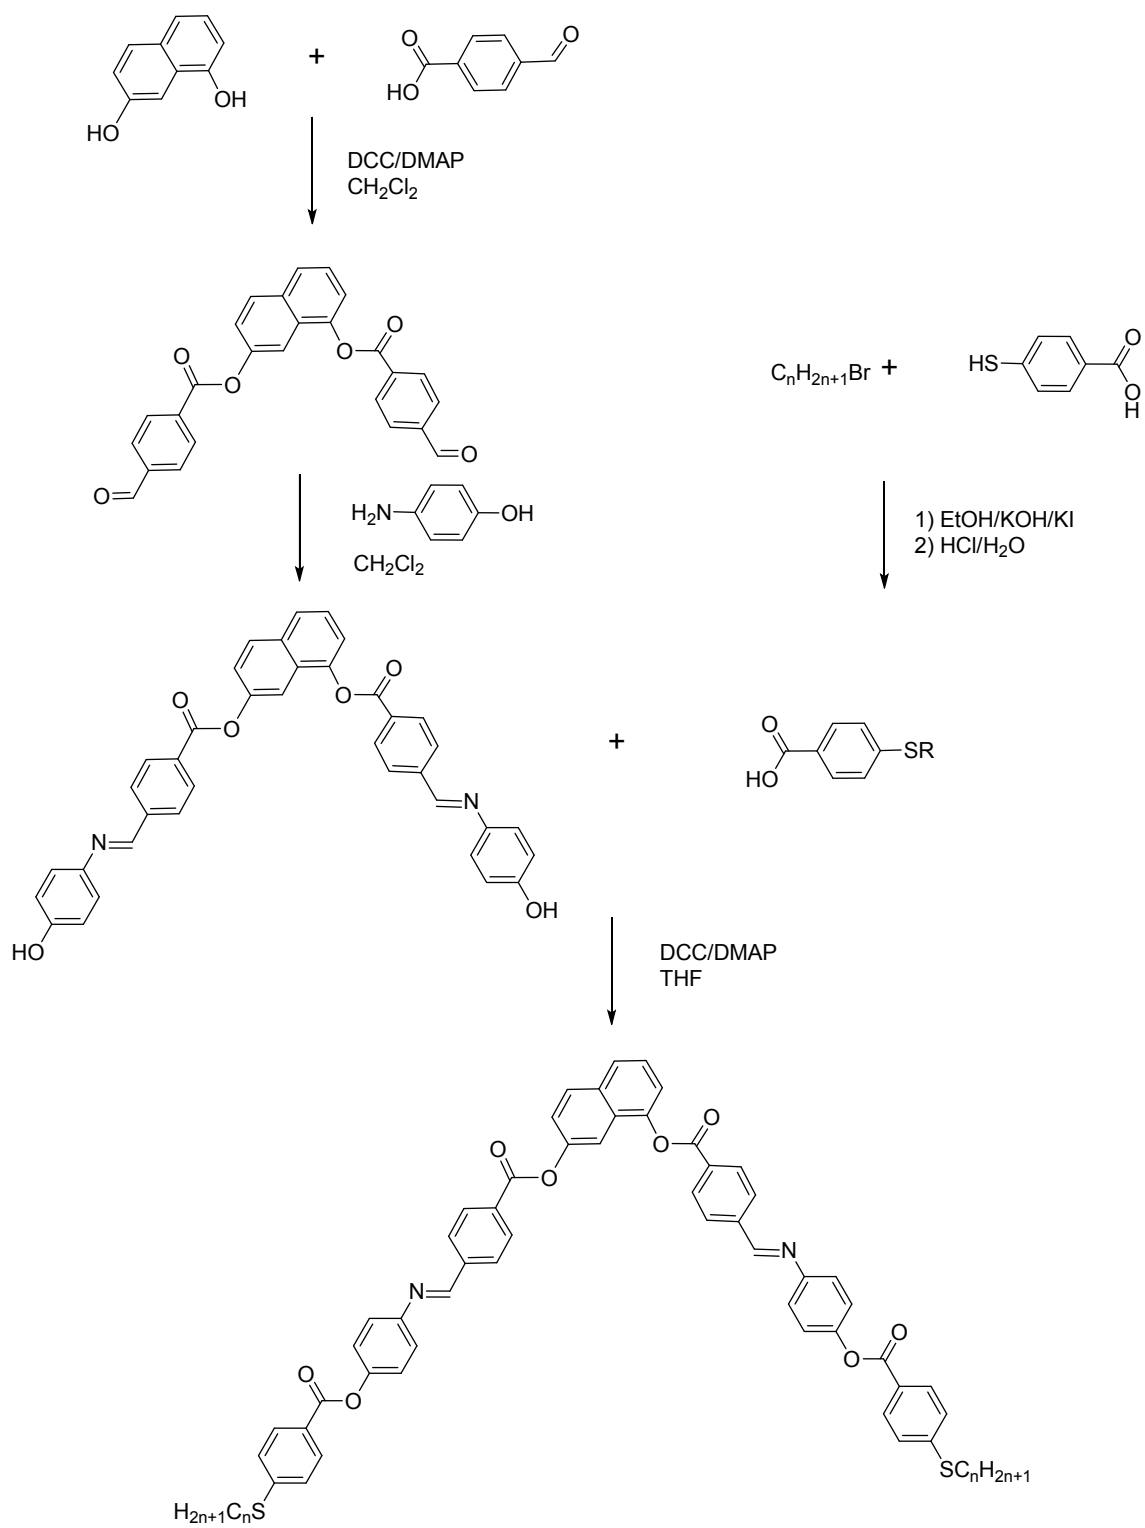

**Scheme S1** Synthetic route of N(1,7)-EIE-*Sn*. ( $n = 16, 18$  and  $20$ )

## Experimental

### Synthesis

#### 1,7-naphthylene bis(4-(4-hydroxyphenyliminomethyl)benzoate)

A mixture of 1,7-naphthylene bis(4-formylbenzoate) (2 g, 4.7 mmol), 4-amino phenol (1.28 g 11.78 mmol) and a few acetic acid catalyst was stirred in chloroform (50 ml) under nitrogen at 40 °C for 8 hr. The reaction mixture was filtered and a remind product was recrystallized from methanol to give a yellow crystal of the target compound. Yield: 2.46 g, 86.2 %; <sup>1</sup>H NMR (400MHz, DMSO, δ in ppm): 9.65 (s, 2H, -OH) 8.79 (s, H, N=CH), 8.75 (s, H, N=CH), 8.37 (d, J=7.92 Hz 2H, Ar-H), 8.25 (d, J=7.80 Hz 2H, Ar-H), 8.20 (d, J=8.90 Hz H, Ar-H), 8.14 (d, J=7.50 Hz 2H, Ar-H), 8.08 (d, J=7.92 Hz 2H, Ar-H), 8.03 (d, J=7.92 Hz H, Ar-H), 7.87 (s, 1H, Ar-H), 7.67-7.57 (m, 3H, Ar-H), 7.31-7.28 (m, 4H, Ar-H), 6.83 (d, J=8.48 Hz 4H, Ar-H).

#### 1,7-naphthylene bis(4-(4-(4-(hexadecylthio)benzoyloxy)phenyliminomethyl)benzoate)

A mixture of 4-hexadecylthiobenzoic acid, (1.56 g, 4.12 mmol), N, N'-dicyclohexylcarbodiimide (DCC) (0.9 g, 4.2 mmol) a catalytic amount of 4-(N,N-dimethylamino)pyridine (DMAP) (0.05, 0.4 mmol), dichloromethane (40 ml) and 1,7-naphthylene bis(4-(4-hydroxyphenyliminomethyl)benzoate) (1.0 g, 1.64 mmol) was stirred for about 24h at room temperature. The precipitated N, N'dicyclohexylurea was filtered off and the filtered solution was washed with 5wt% aqueous acetic acid and water. Obtained solution was removed under reduced pressure. Obtained yellow material was washed by ethanol and was recrystallized from chloroform / ethyl acetate (1:4). Yield: 0.6 g 27.5%; <sup>1</sup>H NMR (400MHz, CDCl<sub>3</sub>, δ in ppm): 8.59 (s, 2H, N=CH), 8.56 (s, 2H, N=CH), 8.44 (d, J=8.29 Hz 2H, Ar-H), 8.33 (d, J=8.23 Hz 2H, Ar-H), 8.11-7.99 (m, 9H, Ar-H), 7.87 (d, J=8.29 Hz 1H, Ar-H), 7.79 (s, 1H, Ar-H), 7.57 (t, J=7.99 Hz 4H, Ar-H) 7.48-7.44(m, 2H, Ar-H), 7.48-7.44(m, 2H, Ar-H), 7.35-7.31(m, 8H, Ar-H), 7.27-7.25(m, 4H, Ar-H), 3.01 (t, J=7.38 Hz 4H, OCH<sub>2</sub>-), 1.72 (m, J=7.62 Hz 4H, OCH<sub>2</sub>CH<sub>2</sub>-), 1.46 (m, J=7.56 Hz 4H, OCH<sub>2</sub>CH<sub>2</sub>CH<sub>2</sub>-), 1.26 (s, 48H, OCH<sub>2</sub>CH<sub>2</sub>CH<sub>2</sub>(CH<sub>2</sub>)<sub>12</sub>-), 0.88 (t, J=7.13 Hz 6H, OCH<sub>2</sub>(CH<sub>2</sub>)<sub>14</sub>CH<sub>3</sub>); <sup>13</sup>C NMR (400MHz, CDCl<sub>3</sub>, δ in ppm): 165.11, 164.89, 164.70, 159.06, 159.02, 153.01, 149.71, 149.37, 149.06, 146.62, 145.98, 140.85, 140.69, 131.61, 131.44, 130.92, 130.79, 130.60, 129.11, 128.96, 127.63, 126.25, 125.60, 122.64, 122.13, 32.06, 32.01, 29.83, 29.79, 29.71, 29.62, 29.51, 29.29, 29.05, 28.80, 22.84, 14.28 ; Anal. Calcd. for C<sub>84</sub>H<sub>98</sub>N<sub>2</sub>O<sub>8</sub>S<sub>2</sub> C 76.37, H 7.72, N 2.02. Found: C 76.12, H 7.58, N 2.04.

#### 1,7-naphthylene bis(4-(4-(4-(octadecylthio)benzoyloxy)phenyliminomethyl)benzoate)

Yield: 0.38 g, 33.3 %; <sup>1</sup>H NMR (400MHz, CDCl<sub>3</sub>, δ in ppm): 8.59 (s, 2H, N=CH), 8.56 (s, 2H, N=CH), 8.44 (d, J=8.29 Hz 2H, Ar-H), 8.33 (d, J=8.35 Hz 2H, Ar-H), 8.11-8.00 (m, 9H, Ar-H), 7.87 (d, J=8.23 Hz 1H, Ar-H), 7.80 (s, 1H, Ar-H), 7.57 (t, J=7.80 Hz 4H, Ar-H) 7.48-7.45(m, 2H, Ar-H), 7.35-7.31(m, 8H, Ar-H), 7.27-7.24(m, 4H, Ar-H), 3.02 (t, J=7.38 Hz 4H, OCH<sub>2</sub>-), 1.73 (m, J=7.56 Hz 4H, OCH<sub>2</sub>CH<sub>2</sub>-), 1.46 (m,

J=7.69 Hz 4H, OCH<sub>2</sub>CH<sub>2</sub>CH<sub>2</sub>-), 1.26 (s, 56H, OCH<sub>2</sub>CH<sub>2</sub>CH<sub>2</sub>(CH<sub>2</sub>)<sub>14</sub>-), 0.88 (t, J=7.02 Hz 6H, OCH<sub>2</sub>(CH<sub>2</sub>)<sub>16</sub>CH<sub>3</sub>); <sup>13</sup>C NMR (400MHz, CDCl<sub>3</sub>, δ in ppm): 165.08, 164.87, 164.69, 159.02, 158.97, 149.79, 149.78, 149.43, 149.10, 146.69, 145.99, 140.91, 140.76, 133.01, 131.68, 131.52, 130.92, 130.80, 130.60, 129.13, 127.69, 126.37, 125.72, 125.63, 122.12, 32.11, 32.07, 29.84, 29.81, 29.78, 29.71, 29.63, 29.50, 29.30, 29.06, 28.85, 22.83, 14.26; Anal. Calcd. for C<sub>88</sub>H<sub>106</sub>N<sub>2</sub>O<sub>8</sub>S<sub>2</sub> C 76.37, H 7.72, N 2.02. Found: C 76.50, H 7.85, N 1.96.

**1,7-naphthylene bis(4-(4-(4-(eicosylthio)benzoyloxy)phenyliminomethyl)benzoate)**

Yield: 0.6 g, 63.2 %; <sup>1</sup>H NMR (400MHz, CDCl<sub>3</sub>, δ in ppm): 8.59 (s, 2H, N=CH), 8.57 (s, 2H, N=CH), 8.45 (d, J=8.42 Hz 2H, Ar-H), 8.33 (d, J=8.48 Hz 2H, Ar-H), 8.11-8.00 (m, 9H, Ar-H), 7.87 (d, J=8.29 Hz 1H, Ar-H), 7.79 (s, 1H, Ar-H), 7.57 (t, J=7.80 Hz 4H, Ar-H) 7.48-7.44(m, 2H, Ar-H), 7.36-7.32(m, 8H, Ar-H), 7.28-7.25(m, 4H, Ar-H), 3.02 (t, J=7.38 Hz 4H, OCH<sub>2</sub>-), 1.72 (m, J=7.62 Hz 4H, OCH<sub>2</sub>CH<sub>2</sub>-), 1.46 (m, J=7.62 Hz 4H, OCH<sub>2</sub>CH<sub>2</sub>CH<sub>2</sub>-), 1.25 (s, 56H, OCH<sub>2</sub>CH<sub>2</sub>CH<sub>2</sub>(CH<sub>2</sub>)<sub>16</sub>-), 0.88 (t, J=7.20 Hz 6H, OCH<sub>2</sub>(CH<sub>2</sub>)<sub>20</sub>CH<sub>3</sub>); <sup>13</sup>C NMR (400MHz, CDCl<sub>3</sub>, δ in ppm): 165.04, 164.87, 164.51, 160.55, 158.73, 149.81, 149.47, 149.08, 146.81, 146.01, 141.12, 140.48, 132.97, 131.60, 130.78, 130.67, 130.55, 130.51, 130.48, 130.45, 129.10, 128.89, 127.68, 126.63, 126.54, 125.94, 122.52, 32.29, 31.93, 29.69, 29.66, 29.63, 29.60, 29.58, 29.48, 29.34, 29.16, 28.92, 22.66 14.02; Anal. Calcd. for C<sub>92</sub>H<sub>114</sub>N<sub>2</sub>O<sub>8</sub>S<sub>2</sub> C 76.73 H 7.98, N 1.95. Found: C 77.95, H 8.17, N 2.01.
